# Supplementary figures and images for: Coupling Machine and Deep Learning with Explainable Artificial Intelligence for Improving Prediction of Groundwater Quality and Decision-Making in Arid Region, Saudi Arabia
Source: MDPI journal article supplement (doi:10.3390/w15122298), 2023-06-20

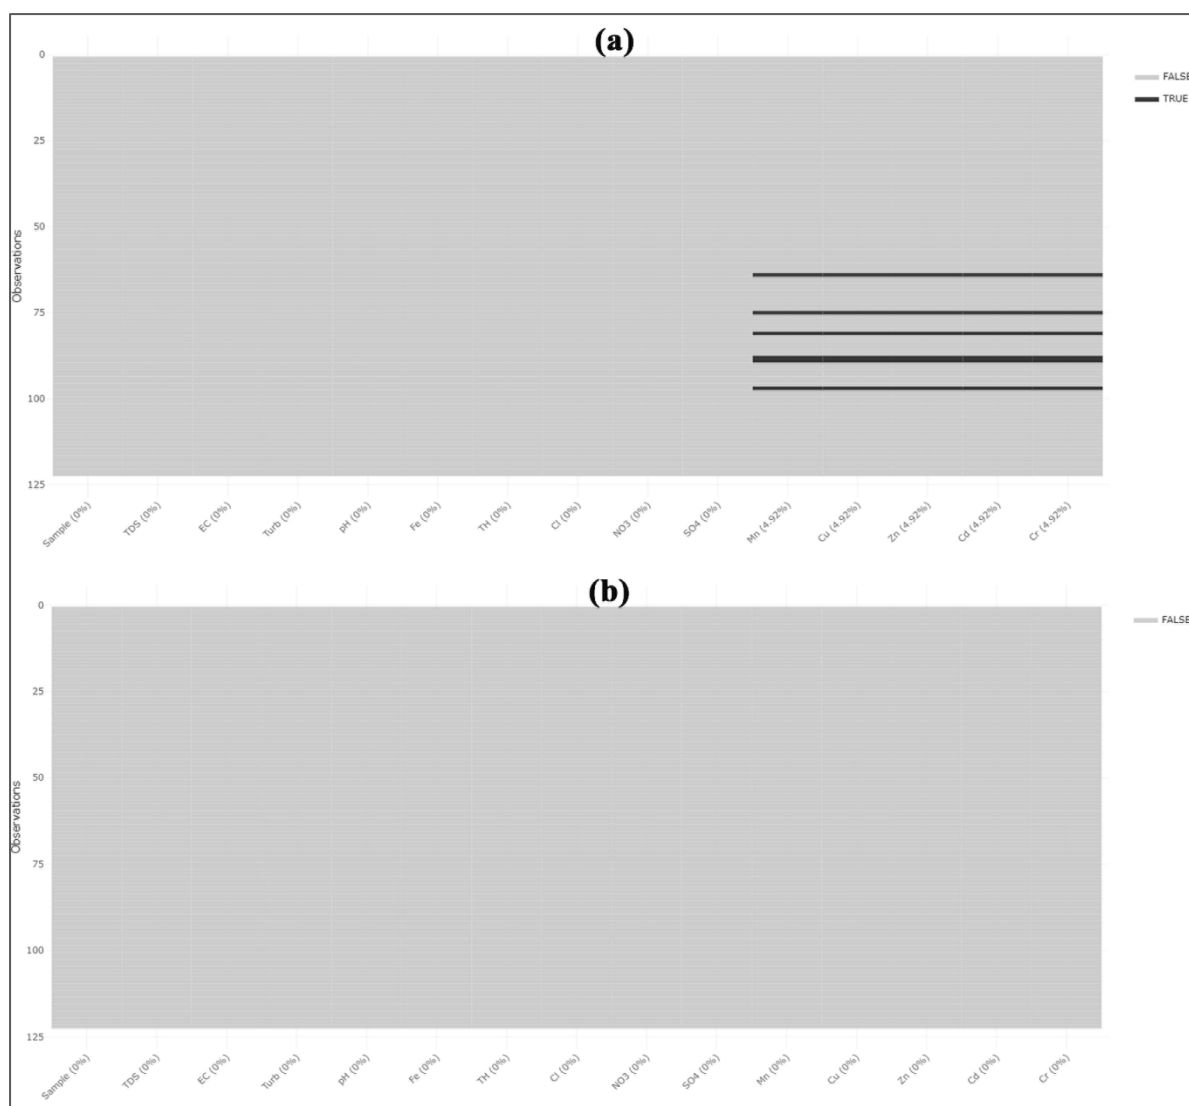

**Figure S1.** Visualization of the missing data before and after the treatment using RF.

Supplement: s1 [file s1]
